# Supplementary material
Source: PubMed Central journal article supplement (PMC5137799)
Supplement: NIHMS824957-supplement-1.pdf [file NIHMS824957-supplement-1.pdf]

## Supplementary Figures and Legends

Huang et al., Comparative evaluation of assays for Fc Receptor-mediated antibody effector functions targeting HIV-1

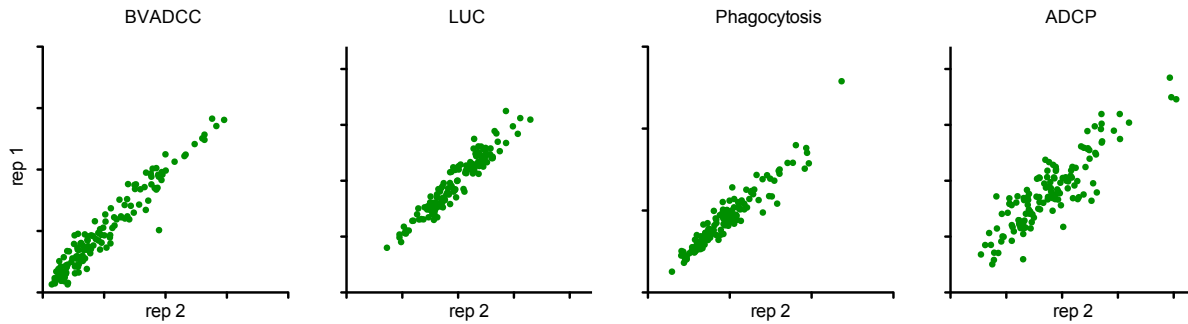

**Supplemental Figure 1: Assay reproducibility.** Scatterplots across assay replicates are presented.

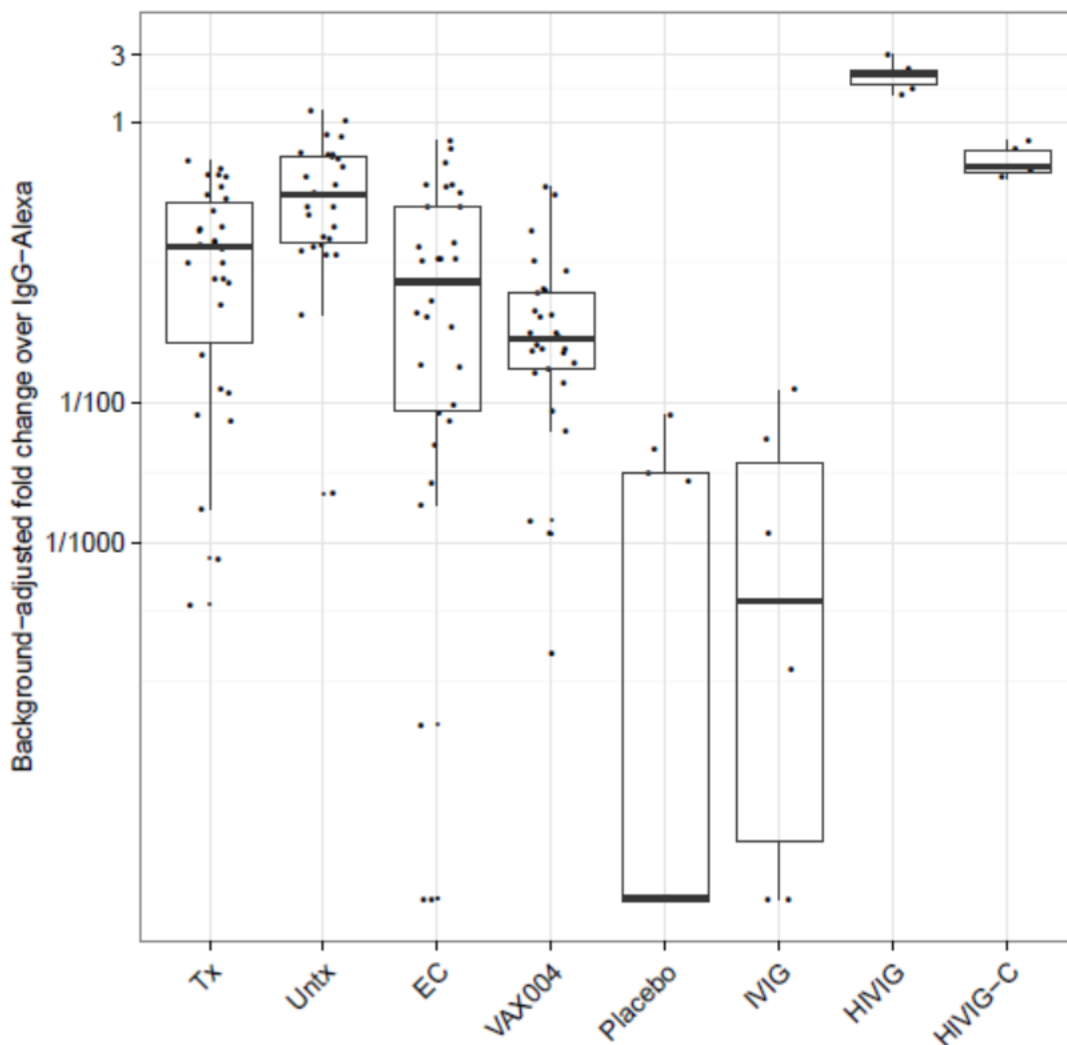

**Supplemental Figure 2: Antibody titers across subject groups.** Each sample was tested in triplicate. Readouts from a given sample were retained only if there were at least 2 reliable spots giving consistent results. The median fluorescent intensity (MFI) of each spot was used as raw data. After eliminating unreliable spots, data were averaged over the replicates. Normalized fold-change values, defined as the background subtracted MFI from the BaL-gp120 (ADCC) antigen divided by the background subtracted MFI with Alexa-anti-IgG (captures all IgG), are plotted. For samples where the Ag signal was less than background, the normalized fold-change value was set to a value equal to one-tenth of the minimum positive normalized value.
